# Supplementary material for: Analytical Pyrolysis of Pinus radiata and Eucalyptus globulus: Effects of Microwave Pretreatment on Pyrolytic Vapours Composition
Source: MDPI journal article supplement (doi:10.3390/polym15183790), 2023-09-17
Supplement: s1 [file s1]

## Article

# Analytical Pyrolysis of *Pinus radiata* and *Eucalyptus globulus*: Effects of Microwave Pretreatment on Pyrolytic Vapours Composition

Diego Venegas-Vásconez <sup>1,2</sup>, Luis E. Arteaga-Pérez <sup>1,3</sup>, María Graciela Aguayo <sup>1,4</sup>, Romina Romero-Carrillo <sup>5</sup>, Víctor H. Guerrero <sup>6</sup>, Luis Tipanluisa-Sarchi <sup>7</sup> and Serguei Alejandro-Martín <sup>1,2,\*</sup>

<sup>1</sup> Departamento de Ingeniería de Maderas, Universidad del Bío-Bío, Concepción, 4081112, Chile

<sup>2</sup> Laboratorio de Cromatografía Gaseosa y Pirólisis Analítica, Universidad del Bío-Bío, Concepción, 4081112, Chile.

<sup>3</sup> Laboratorio de Procesos Térmicos y Catalíticos, Universidad del Bío-Bío, Concepción, 4081112, Chile.

<sup>4</sup> Centro de Biomateriales y Nanotecnología, Universidad del Bío-Bío, Concepción, 4081112, Chile.

<sup>5</sup> Departamento de Química Analítica e Inorgánica, Facultad de Ciencias Químicas, Universidad de Concepción, Concepción, 4070371, Chile

<sup>6</sup> Departamento de Materiales, Escuela Politécnica Nacional, Quito, 170525, Ecuador

<sup>7</sup> Facultad de Mecánica, Escuela Superior Politécnica de Chimborazo, Riobamba, 060155, Ecuador

\* Correspondence: salejandro@ubiobio.cl

**Citation:** Venegas-Vásconez, D.; Arteaga-Pérez, L. E.; Aguayo, M.G.; Romero-Carrillo, R.; Guerrero, V. H.; Tipanluisa-Sarchi, L.; Alejandro-Martín, S. Analytical Pyrolysis of *Pinus radiata* and *Eucalyptus globulus*: Effects of Microwave Pretreatment on Pyrolytic Vapours Composition. *Polymers* **2023**, *15*, x. <https://doi.org/10.3390/xxxxx>

Academic Editors: Chi-Hui Tsou and Chih-Yuan Tsou

Received: 12 August 2023

Revised: 10 September 2023

Accepted: 14 September 2023

Published: date

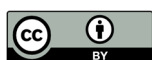

**Copyright:** © 2023 by the authors. Submitted for possible open access publication under the terms and conditions of the Creative Commons Attribution (CC BY) license (<https://creativecommons.org/licenses/by/4.0/>).

**Table S1.** Microwave pretreatment parameters for PR and EG.

| Sample | Microwave | 1 min            |                  |                   | 2 min            |                  |                   | 3 min            |                  |                   | 5 min            |                  |                   |
|--------|-----------|------------------|------------------|-------------------|------------------|------------------|-------------------|------------------|------------------|-------------------|------------------|------------------|-------------------|
|        |           | T <sub>avg</sub> | T <sub>max</sub> | W <sub>loss</sub> | T <sub>avg</sub> | T <sub>max</sub> | W <sub>loss</sub> | T <sub>avg</sub> | T <sub>max</sub> | W <sub>loss</sub> | T <sub>avg</sub> | T <sub>max</sub> | W <sub>loss</sub> |
|        |           | °C               | °C               | %                 |
| PR     | 259       | 54,68 ± 1.25     | 64,41 ± 1.36     | 1,44 ± 0.13       | 63,02 ± 1.69     | 66,12 ± 2.15     | 4,01 ± 0.18       | 65,45 ± 1.76     | 69,61 ± 3.02     | 6,24 ± 0.35       | 73,35 ± 2.38     | 78,11 ± 1.89     | 7,61 ± 0.14       |
|        | 462       | 78,33 ± 2.16     | 86,02 ± 0.95     | 3,76 ± 0.15       | 80,02 ± 2.41     | 86,29 ± 3.15     | 5,38 ± 0.09       | 88,57 ± 1.23     | 96,79 ± 2.15     | 7,86 ± 0.26       | 94,63 ± 3.01     | 106,79 ± 0.87    | 8,26 ± 0.16       |
|        | 595       | 77,73 ± 1.87     | 84,79 ± 1.23     | 4,23 ± 0.24       | 84,57 ± 0.67     | 92,01 ± 2.89     | 6,25 ± 0.14       | 95,32 ± 0.157    | 104,21 ± 2.54    | 8,97 ± 0.19       | 102,85 ± 2.68    | 115,72 ± 1.24    | 10,15 ± 0.17      |
|        | 700       | 80,62 ± 1.93     | 93,50 ± 1.78     | 5,48 ± 0.23       | 87,45 ± 1.26     | 103,61 ± 2.46    | 7,31 ± 0.12       | 103,47 ± 2.47    | 120,32 ± 2.01    | 10,04 ± 0.82      | 115,17 ± 3.04    | 147,69 ± 1.56    | 11,06 ± 0.08      |
| EG     | 259       | 42,78 ± 1.24     | 46,12 ± 0.49     | 0,69 ± 0.11       | 50,40 ± 1.47     | 57,70 ± 1.32     | 1,51 ± 0.04       | 50,98 ± 2.10     | 57,01 ± 1.23     | 2,63 ± 0.12       | 54,72 ± 0.16     | 59,71 ± 2.06     | 3,12 ± 0.41       |
|        | 462       | 57,78 ± 1.47     | 65,69 ± 3.26     | 1,11 ± 0.05       | 68,68 ± 1.98     | 75,91 ± 1.52     | 2,14 ± 0.26       | 78,93 ± 1.56     | 85,98 ± 1.27     | 3,23 ± 0.15       | 90,31 ± 2.87     | 106,61 ± 1.78    | 3,72 ± 0.16       |
|        | 595       | 72,63 ± 1.52     | 80,02 ± 1.89     | 1,33 ± 0.10       | 78,43 ± 2.01     | 84,89 ± 1.87     | 3,01 ± 0.13       | 83,67 ± 1.89     | 97,89 ± 1.96     | 4,12 ± 0.16       | 97,53 ± 2.16     | 109,10 ± 3.14    | 4,71 ± 0.32       |
|        | 700       | 72,37 ± 1.71     | 79,21 ± 2.11     | 1,79 ± 0.15       | 94,82 ± 2.45     | 106,62 ± 1.59    | 3,47 ± 0.17       | 99,82 ± 2.03     | 118,02 ± 1.90    | 4,58 ± 0.14       | 101,98 ± 1.07    | 130,71 ± 2.79    | 5,17 ± 0.40       |

**Table S2.** Kinetic parameters and the characteristic temperatures of the thermogravimetric tests.

| Bio-mass | $\alpha$<br>°C/min | Pretreatment<br>W-min | T <sub>initial</sub><br>°C | T <sub>onset</sub><br>°C | T <sub>shoulder</sub><br>°C | T <sub>peak</sub><br>°C | T <sub>offset</sub><br>°C | Y <sub>shoulder</sub><br>% | Y <sub>peak</sub><br>% | Y <sub>offset</sub><br>% | %Res  | dY/dT <sub>shoulder</sub><br>10 <sup>-3</sup> s <sup>-1</sup> | dY/dT <sub>peak</sub><br>10 <sup>-3</sup> s <sup>-1</sup> |
|----------|--------------------|-----------------------|----------------------------|--------------------------|-----------------------------|-------------------------|---------------------------|----------------------------|------------------------|--------------------------|-------|---------------------------------------------------------------|-----------------------------------------------------------|
| PR       | 5                  | WOT                   | 28.84                      | 231.42                   | 309.25                      | 345.61                  | 367.09                    | 61.84                      | 89.01                  | 22.54                    | 13.53 | -0.70                                                         | -1.06                                                     |
|          |                    | 259 - 5               | 39.12                      | 239.54                   | 319.51                      | 356.01                  | 380.71                    | 61.01                      | 84.75                  | 21.03                    | 13.55 | -0.70                                                         | -1.01                                                     |
|          |                    | 700 - 5               | 36.24                      | 251.64                   | 326.00                      | 358.07                  | 386.93                    | 62.04                      | 68.02                  | 25.01                    | 15.05 | -0.71                                                         | -0.82                                                     |
|          | 10                 | WOT                   | 33.72                      | 229.64                   | 310.05                      | 344.26                  | 365.17                    | 66.84                      | 93.14                  | 22.82                    | 12.40 | -0.73                                                         | -1.12                                                     |
|          |                    | 259 - 5               | 38.88                      | 244.71                   | 319.03                      | 355.84                  | 377.86                    | 67.25                      | 81.45                  | 25.19                    | 16.89 | -0.73                                                         | -0.97                                                     |
|          |                    | 700 - 5               | 36.57                      | 254.76                   | 330.58                      | 366.41                  | 401.93                    | 65.01                      | 71.46                  | 20.85                    | 15.36 | -0.73                                                         | -0.85                                                     |
|          | 20                 | WOT                   | 33.81                      | 228.56                   | 309.85                      | 343.86                  | 365.76                    | 66.87                      | 91.85                  | 24.17                    | 8.26  | -0.74                                                         | -1.08                                                     |
|          |                    | 259 - 5               | 36.68                      | 237.54                   | 319.56                      | 354.71                  | 384.01                    | 67.18                      | 82.84                  | 24.65                    | 11.82 | -0.74                                                         | -0.99                                                     |
|          |                    | 700 - 5               | 39.21                      | 249.16                   | 327.17                      | 366.85                  | 399.61                    | 68.23                      | 69.13                  | 21.83                    | 13.89 | -0.74                                                         | -0.83                                                     |
| EG       | 5                  | WOT                   | 32.02                      | 229.41                   | 279.59                      | 336.80                  | 357.23                    | 12.98                      | 76.92                  | 37.58                    | 20.61 | -0.48                                                         | -1.25                                                     |
|          |                    | 259 - 5               | 50.88                      | 233.76                   | 297.32                      | 349.17                  | 369.33                    | 15.05                      | 77.58                  | 40.21                    | 22.53 | -0.48                                                         | -1.15                                                     |
|          |                    | 700 - 5               | 44.88                      | 240.83                   | 337.27                      | 361.52                  | 391.34                    | 12.14                      | 74.82                  | 41.40                    | 20.34 | -0.46                                                         | -0.91                                                     |
|          | 10                 | WOT                   | 33.48                      | 225.39                   | 278.34                      | 338.17                  | 355.14                    | 12.42                      | 77.42                  | 37.33                    | 19.12 | -0.48                                                         | -1.27                                                     |
|          |                    | 259 - 5               | 39.06                      | 234.28                   | 293.25                      | 349.26                  | 368.29                    | 13.73                      | 75.46                  | 37.34                    | 21.34 | -0.48                                                         | -1.13                                                     |
|          |                    | 700 - 5               | 50.41                      | 240.36                   | 339.13                      | 360.27                  | 396.32                    | 9.88                       | 73.18                  | 25.98                    | 18.30 | -0.49                                                         | -0.94                                                     |
|          | 20                 | WOT                   | 34.97                      | 225.31                   | 280.31                      | 338.21                  | 353.32                    | 13.55                      | 77.63                  | 37.15                    | 21.30 | -0.47                                                         | -1.29                                                     |
|          |                    | 259 - 5               | 48.01                      | 234.76                   | 291.46                      | 348.40                  | 369.37                    | 11.59                      | 77.78                  | 37.19                    | 19.48 | -0.49                                                         | -1.20                                                     |
|          |                    | 700 - 5               | 41.90                      | 240.91                   | 309.24                      | 362.38                  | 393.47                    | 16.11                      | 74.97                  | 41.31                    | 22.03 | -0.44                                                         | -1.19                                                     |

**Table S3.** Pyrolysis compounds of PR and EG (WOT, 259 - 700 W) (WE) and (WOE).

| Family   | Chemical compounds                    | PR %Area WE |      |      | PR %Area WOE |      |      | EG %Area WE |      |      | EG %Area WOE |      |      |
|----------|---------------------------------------|-------------|------|------|--------------|------|------|-------------|------|------|--------------|------|------|
|          |                                       | WOT         | 259  | 700  | WOT          | 259  | 700  | WOT         | 259  | 700  | WOT          | 259  | 700  |
| Phenol   | Creosol                               | 7.10        | 6.68 | 5.79 | 6.45         | 6.00 | 5.81 | 3.01        | 2.66 | 3.01 | 2.23         | 2.22 | 2.58 |
| Acid     | Acetic acid                           | 6.72        | 4.97 | 4.77 | 6.43         | 6.29 | 5.59 | 10.85       | 9.95 | 9.49 | 10.75        | 9.30 | 8.48 |
| Phenol   | 2-Methoxy-4-vinylphenol               | 6.49        | 6.03 | 6.06 | 5.24         | 5.02 | 4.97 | 2.44        | 2.18 | 1.81 | 1.85         | 2.11 | 2.31 |
| Phenol   | Phenol, 2-methoxy-                    | 5.84        | 5.20 | 4.85 | 4.20         | 3.71 | 3.97 | 1.69        | 1.70 | 1.70 | 0.94         | 1.12 | 1.25 |
| Phenol   | Phenol, 2-methoxy-4-(1-propenyl)-     | 5.32        | 5.13 | 4.27 | 0.73         | 4.80 | 5.73 | 0.61        | 0.55 | 0.58 | 0.31         | 0.21 | 0.21 |
| Acid     | Acetic acid, (acetyloxy)-             | 4.52        | 3.74 | 3.53 | 4.22         | 4.18 | 4.01 | 5.12        | 4.88 | 4.64 | 5.03         | 4.51 | 3.68 |
| Alcohol  | Acetol                                | 4.00        | 5.72 | 6.83 | 4.87         | 5.56 | 5.72 | 4.35        | 4.98 | 5.93 | 3.53         | 4.43 | 4.61 |
| Acid     | Propanoic acid, 2-oxo-, methyl ester  | 3.61        | 2.72 | 1.32 | 3.02         | 2.92 | 1.26 | 2.69        | 2.40 | 2.30 | 2.78         | 2.85 | 1.64 |
| Alcohol  | 2(5H)-Furanone                        | 3.37        | 2.97 | 3.08 | 2.49         | 3.10 | 3.00 | 1.30        | 1.30 | 0.88 | 0.66         | 0.85 | 0.88 |
| Ketone   | 2-Cyclopenten-1-one, 2-hydroxy-       | 3.09        | 3.50 | 3.67 | 3.21         | 3.95 | 4.10 | 2.93        | 3.06 | 3.56 | 3.14         | 3.57 | 4.00 |
| Ketone   | 1,2-Cyclopentanedione, 3-methyl-      | 2.65        | 2.50 | 2.42 | 2.53         | 2.62 | 2.82 | 2.37        | 2.33 | 2.30 | 1.91         | 2.11 | 2.44 |
| Alcohol  | 1,3-propanediol                       | 2.63        | 2.63 | 2.63 | 2.43         | 2.66 | 2.70 | 0.70        | 0.75 | 0.78 | 0.53         | 0.74 | 0.67 |
| Aldehyde | Succindialdehyde                      | 2.51        | 2.28 | 2.10 | 2.12         | 2.37 | 3.14 | 2.14        | 2.15 | 2.27 | 1.28         | 1.70 | 2.32 |
| Acid     | Oxalic acid                           | 2.33        | 2.33 | 2.15 | 2.28         | 1.57 | 1.51 | 5.48        | 5.29 | 4.60 | 4.69         | 4.41 | 3.48 |
| Phenol   | Phenol, 4-ethyl-2-methoxy-            | 2.28        | 1.99 | 1.63 | 2.89         | 2.32 | 2.14 | 0.69        | 0.71 | 0.69 | 1.42         | 0.57 | 0.75 |
| Acid     | Acetic acid ethenyl ester             | 2.07        | 1.85 | 1.67 | 2.20         | 2.16 | 1.87 | 1.86        | 1.98 | 2.12 | 1.40         | 1.78 | 2.35 |
| Aldehyde | Furfural                              | 1.75        | 1.99 | 2.21 | 2.06         | 2.18 | 2.30 | 2.64        | 2.74 | 2.81 | 2.06         | 2.25 | 3.00 |
| Aldehyde | Methyl glyoxal                        | ND          | 2.14 | 2.71 | 3.64         | 4.25 | 4.18 | 3.12        | 3.47 | 3.65 | 2.77         | 3.80 | 4.25 |
| Aldehyde | Benzaldehyde, 2,4-dihydroxy-6-methyl- | 0.70        | 0.71 | 1.37 | 1.15         | 1.11 | 1.59 | 3.40        | 3.21 | 2.93 | 3.07         | 3.20 | 3.10 |
| Phenol   | Phenol, 2,6-dimethoxy-                | ND          | ND   | ND   | ND           | ND   | ND   | 5.13        | 4.91 | 4.54 | 5.12         | 4.74 | 4.60 |
| Aldehyde | Hydroxyacetaldehyde                   | ND          | ND   | ND   | ND           | ND   | ND   | 2.08        | 2.36 | 2.88 | 1.32         | 1.83 | 1.85 |

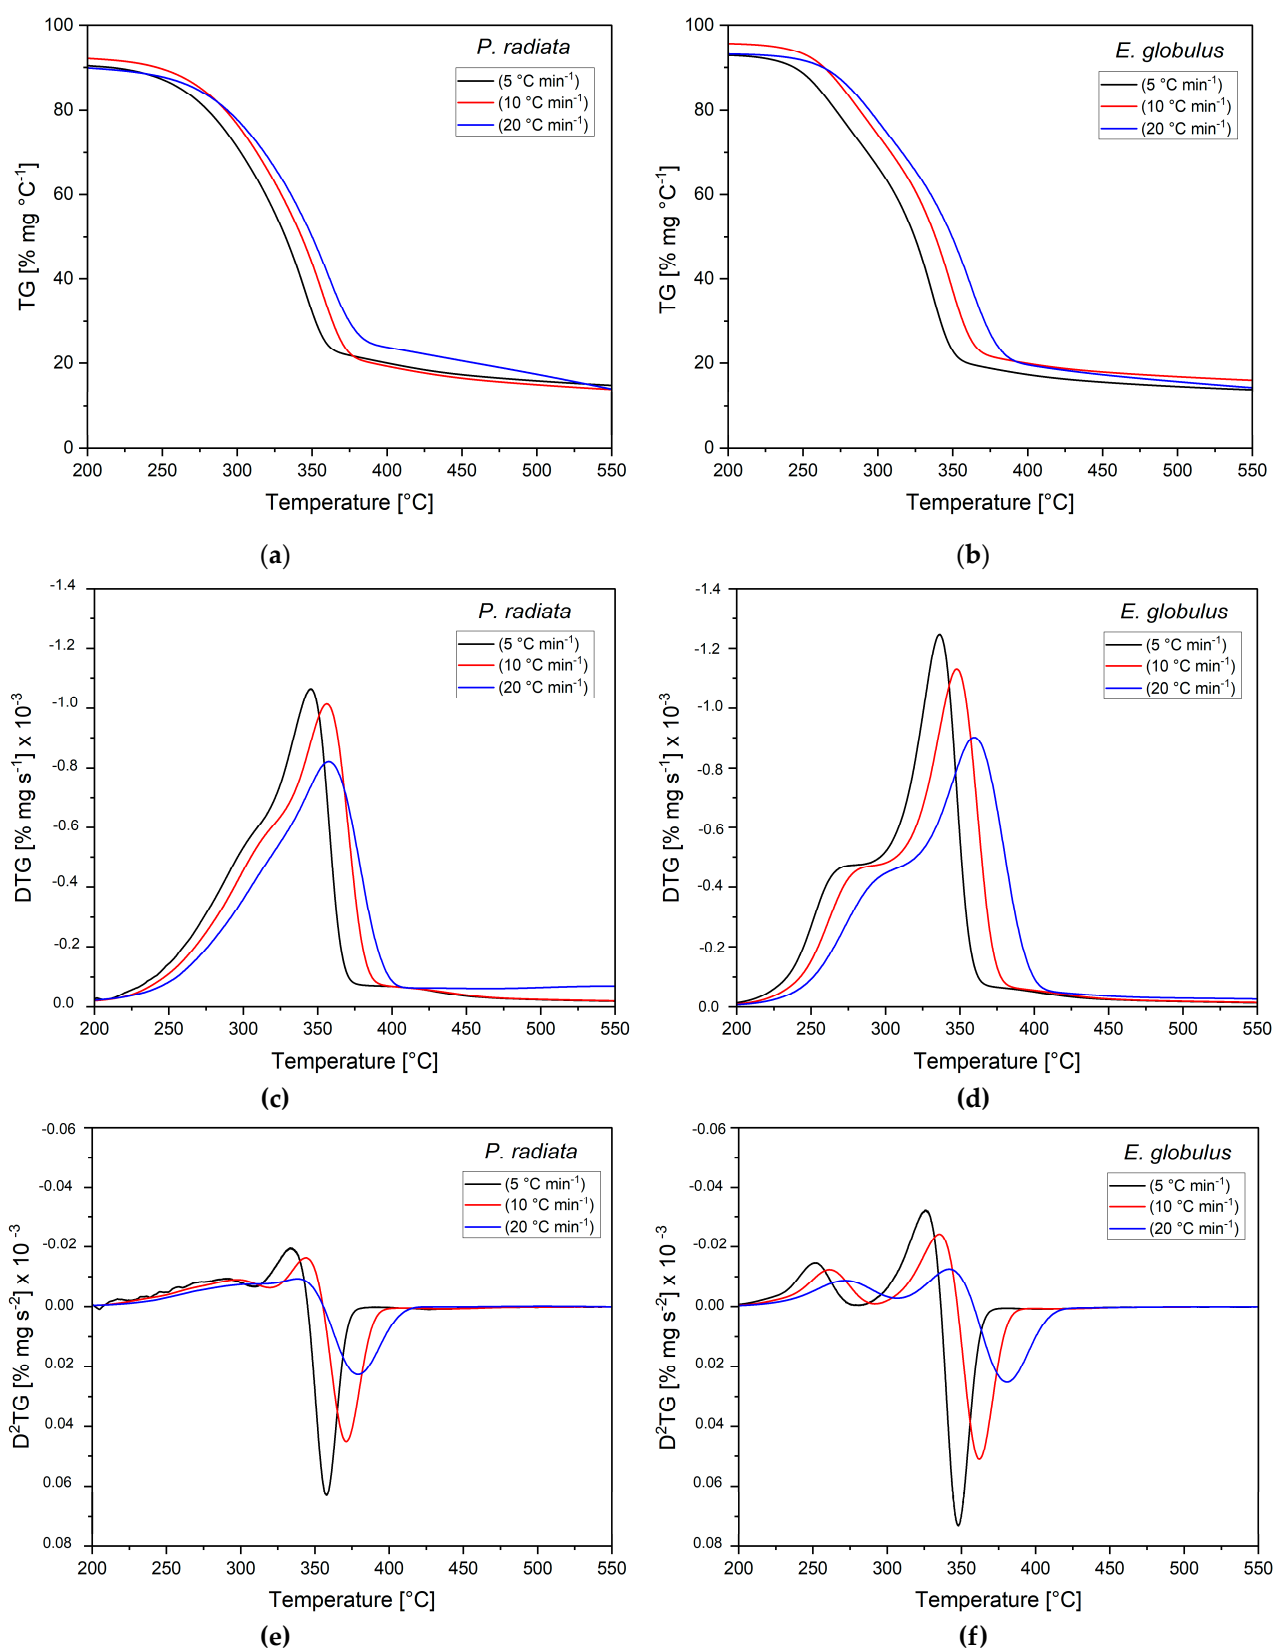

**Figure S1.** TG for a) *Pinus radiata* b) *Eucalyptus globulus*, DTG for c) *Pinus radiata* d) *Eucalyptus globulus* and D<sup>2</sup>TG for e) *Pinus radiata* f) *Eucalyptus globulus* at 5, 10 and 20 °C min<sup>-1</sup>.
